# Supplementary material for: MiR-15b-5p Expression in the Peripheral Blood: A Potential Diagnostic Biomarker of Autism Spectrum Disorder
Source: MDPI journal article supplement (doi:10.3390/brainsci13010027), 2022-12-22
Supplement: s1 [file s1]

**Table S1.** Primers for the qPCR experiment.

| <b>miRNAs</b>   | <b>Primer sequence (5' - 3')</b> |
|-----------------|----------------------------------|
| hsa-miR-15b-5p  | TAGCAGCACATCATGGTTTACA           |
| hsa-miR-15a-5p  | AGCAGCACATAATGGTTTGTGAAA         |
| hsa-miR-19b-3p  | TGTGCAAATCCATGCAAACTGAAA         |
| hsa-miR-27a-3p  | TTCACAGTGGCTAAGTTCCGC            |
| hsa-miR-106b-5p | TAAAGTGCTGACAGTGCAGAT            |
| hsa-miR-320a-5p | CTTCTCTTCCCGGTTCTTCCAAA          |
| hsa-miR-320a-3p | AAAAGCTGGGTTGAGAGGGCGA           |
| hsa-miR-451a    | AAACCGTTACCATTACTGAGTT           |
| hsa-miR-494-5p  | AGGTTGTCCGTGTTGTCTTCTCTAA        |
| hsa-miR-494-3p  | TGAAACATACACGGGAAACCTCAAA        |

miRNA/miR, microRNA; hsa : Homo Sapiens.

**Table S2.** Predicted target genes of miR-15b-5p using miRDB.

| <b>Target Rank</b> | <b>Target Score</b> | <b>miRNA Name</b> | <b>Gene Symbol</b> |
|--------------------|---------------------|-------------------|--------------------|
| 1                  | 100                 | hsa-miR-15b-5p    | PAPPA              |
| 2                  | 100                 | hsa-miR-15b-5p    | FASN               |
| 3                  | 100                 | hsa-miR-15b-5p    | UNC80              |
| 4                  | 100                 | hsa-miR-15b-5p    | FGF2               |
| 5                  | 100                 | hsa-miR-15b-5p    | TNRC6B             |
| 6                  | 100                 | hsa-miR-15b-5p    | PTPN4              |
| 7                  | 100                 | hsa-miR-15b-5p    | PHF19              |
| 8                  | 100                 | hsa-miR-15b-5p    | DESI1              |
| 9                  | 99                  | hsa-miR-15b-5p    | UBE2Q1             |
| 10                 | 99                  | hsa-miR-15b-5p    | LSM11              |
| 11                 | 99                  | hsa-miR-15b-5p    | NECTIN1            |
| 12                 | 99                  | hsa-miR-15b-5p    | GAREM1             |
| 13                 | 99                  | hsa-miR-15b-5p    | ANKUB1             |
| 14                 | 99                  | hsa-miR-15b-5p    | FBXO21             |
| 15                 | 99                  | hsa-miR-15b-5p    | CCNE1              |
| 16                 | 99                  | hsa-miR-15b-5p    | ATG14              |
| 17                 | 99                  | hsa-miR-15b-5p    | KIF1B              |
| 18                 | 99                  | hsa-miR-15b-5p    | LUZP1              |
| 19                 | 99                  | hsa-miR-15b-5p    | SLC13A3            |
| 20                 | 99                  | hsa-miR-15b-5p    | ARIH1              |
| 21                 | 99                  | hsa-miR-15b-5p    | MGAT4A             |
| 22                 | 99                  | hsa-miR-15b-5p    | EPHB2              |
| 23                 | 99                  | hsa-miR-15b-5p    | BTRC               |
| 24                 | 99                  | hsa-miR-15b-5p    | SPRYD3             |
| 25                 | 99                  | hsa-miR-15b-5p    | ARL2               |
| 26                 | 99                  | hsa-miR-15b-5p    | CASK               |
| 27                 | 99                  | hsa-miR-15b-5p    | NUP50              |

|    |    |                |          |
|----|----|----------------|----------|
| 28 | 99 | hsa-miR-15b-5p | DCLK1    |
| 29 | 99 | hsa-miR-15b-5p | CYB561A3 |
| 30 | 99 | hsa-miR-15b-5p | ZBTB46   |
| 31 | 99 | hsa-miR-15b-5p | FGF7     |
| 32 | 98 | hsa-miR-15b-5p | RECK     |
| 33 | 98 | hsa-miR-15b-5p | PLAG1    |
| 34 | 98 | hsa-miR-15b-5p | AXIN2    |
| 35 | 98 | hsa-miR-15b-5p | GPR63    |
| 36 | 98 | hsa-miR-15b-5p | SYNJ1    |
| 37 | 98 | hsa-miR-15b-5p | ABL2     |
| 38 | 98 | hsa-miR-15b-5p | SCN8A    |
| 39 | 98 | hsa-miR-15b-5p | CACNA1E  |
| 40 | 98 | hsa-miR-15b-5p | PISD     |
| 41 | 98 | hsa-miR-15b-5p | KCNJ2    |
| 42 | 98 | hsa-miR-15b-5p | C2orf42  |
| 43 | 98 | hsa-miR-15b-5p | UBE2V1   |
| 44 | 98 | hsa-miR-15b-5p | SPRED1   |
| 45 | 98 | hsa-miR-15b-5p | SREK1    |
| 46 | 98 | hsa-miR-15b-5p | TBL1XR1  |
| 47 | 98 | hsa-miR-15b-5p | MTMR3    |
| 48 | 98 | hsa-miR-15b-5p | TLK1     |
| 49 | 98 | hsa-miR-15b-5p | SLC11A2  |
| 50 | 98 | hsa-miR-15b-5p | MOB3B    |
| 51 | 98 | hsa-miR-15b-5p | ZBTB44   |
| 52 | 98 | hsa-miR-15b-5p | ANO3     |
| 53 | 98 | hsa-miR-15b-5p | SLC9A6   |
| 54 | 98 | hsa-miR-15b-5p | APLN     |
| 55 | 98 | hsa-miR-15b-5p | AKT3     |
| 56 | 98 | hsa-miR-15b-5p | IPO7     |
| 57 | 98 | hsa-miR-15b-5p | RASGEF1B |
| 58 | 98 | hsa-miR-15b-5p | ATG9A    |
| 59 | 98 | hsa-miR-15b-5p | CPEB2    |
| 60 | 98 | hsa-miR-15b-5p | AHCYL2   |
| 61 | 98 | hsa-miR-15b-5p | MYB      |
| 62 | 98 | hsa-miR-15b-5p | CCND2    |
| 63 | 98 | hsa-miR-15b-5p | KIF5C    |
| 64 | 98 | hsa-miR-15b-5p | UBN2     |
| 65 | 98 | hsa-miR-15b-5p | UBE4B    |
| 66 | 98 | hsa-miR-15b-5p | ARL3     |
| 67 | 97 | hsa-miR-15b-5p | MAMSTR   |
| 68 | 97 | hsa-miR-15b-5p | RNF144B  |
| 69 | 97 | hsa-miR-15b-5p | CDCA4    |
| 70 | 97 | hsa-miR-15b-5p | KDSR     |
| 71 | 97 | hsa-miR-15b-5p | KIF23    |
| 72 | 97 | hsa-miR-15b-5p | TFAP2A   |
| 73 | 97 | hsa-miR-15b-5p | PPM1E    |

|     |    |                |           |
|-----|----|----------------|-----------|
| 74  | 97 | hsa-miR-15b-5p | SHOC2     |
| 75  | 97 | hsa-miR-15b-5p | HTR2A     |
| 76  | 97 | hsa-miR-15b-5p | LURAP1L   |
| 77  | 97 | hsa-miR-15b-5p | DMPK      |
| 78  | 97 | hsa-miR-15b-5p | RAB11FIP2 |
| 79  | 97 | hsa-miR-15b-5p | TMEM100   |
| 80  | 97 | hsa-miR-15b-5p | RASSF8    |
| 81  | 97 | hsa-miR-15b-5p | FBXW7     |
| 82  | 97 | hsa-miR-15b-5p | DNAJB4    |
| 83  | 97 | hsa-miR-15b-5p | GRM7      |
| 84  | 97 | hsa-miR-15b-5p | WEE1      |
| 85  | 97 | hsa-miR-15b-5p | STOX2     |
| 86  | 97 | hsa-miR-15b-5p | CYP26B1   |
| 87  | 96 | hsa-miR-15b-5p | N4BP1     |
| 88  | 96 | hsa-miR-15b-5p | PLPP1     |
| 89  | 96 | hsa-miR-15b-5p | ZNF691    |
| 90  | 96 | hsa-miR-15b-5p | ZCCHC3    |
| 91  | 96 | hsa-miR-15b-5p | ARMH4     |
| 92  | 96 | hsa-miR-15b-5p | SALL4     |
| 93  | 96 | hsa-miR-15b-5p | TBPL1     |
| 94  | 96 | hsa-miR-15b-5p | CFAP45    |
| 95  | 96 | hsa-miR-15b-5p | CNOT6L    |
| 96  | 96 | hsa-miR-15b-5p | SEMA6D    |
| 97  | 96 | hsa-miR-15b-5p | RFX3      |
| 98  | 96 | hsa-miR-15b-5p | PCMT1     |
| 99  | 96 | hsa-miR-15b-5p | EDA       |
| 100 | 96 | hsa-miR-15b-5p | SEC24A    |
| 101 | 96 | hsa-miR-15b-5p | KLHL2     |
| 102 | 96 | hsa-miR-15b-5p | PAFAH1B1  |
| 103 | 96 | hsa-miR-15b-5p | PTPN3     |
| 104 | 96 | hsa-miR-15b-5p | CASR      |
| 105 | 96 | hsa-miR-15b-5p | MYLK      |
| 106 | 96 | hsa-miR-15b-5p | CCDC6     |
| 107 | 96 | hsa-miR-15b-5p | NAPG      |
| 108 | 96 | hsa-miR-15b-5p | ZNF367    |
| 109 | 95 | hsa-miR-15b-5p | ZMAT3     |
| 110 | 95 | hsa-miR-15b-5p | STXBP5    |
| 111 | 95 | hsa-miR-15b-5p | UBFD1     |
| 112 | 95 | hsa-miR-15b-5p | CHAC1     |
| 113 | 95 | hsa-miR-15b-5p | HIPK2     |
| 114 | 95 | hsa-miR-15b-5p | UBE4A     |
| 115 | 95 | hsa-miR-15b-5p | CEP55     |
| 116 | 95 | hsa-miR-15b-5p | MKX       |
| 117 | 95 | hsa-miR-15b-5p | CBX2      |
| 118 | 95 | hsa-miR-15b-5p | TNFSF13B  |
| 119 | 95 | hsa-miR-15b-5p | IPPK      |

|     |    |                |           |
|-----|----|----------------|-----------|
| 120 | 95 | hsa-miR-15b-5p | VEGFA     |
| 121 | 95 | hsa-miR-15b-5p | SLC25A37  |
| 122 | 95 | hsa-miR-15b-5p | ZBTB34    |
| 123 | 95 | hsa-miR-15b-5p | KIF5B     |
| 124 | 95 | hsa-miR-15b-5p | SETD3     |
| 125 | 95 | hsa-miR-15b-5p | PAFAH1B2  |
| 126 | 95 | hsa-miR-15b-5p | MAP2K1    |
| 127 | 95 | hsa-miR-15b-5p | SMURF1    |
| 128 | 95 | hsa-miR-15b-5p | GABARAPL1 |
| 129 | 95 | hsa-miR-15b-5p | USP25     |
| 130 | 95 | hsa-miR-15b-5p | STXBP3    |
| 131 | 95 | hsa-miR-15b-5p | FGFR1     |
| 132 | 95 | hsa-miR-15b-5p | MYBL1     |
| 133 | 95 | hsa-miR-15b-5p | GPATCH8   |
| 134 | 95 | hsa-miR-15b-5p | CBX4      |
| 135 | 94 | hsa-miR-15b-5p | JPH3      |
| 136 | 94 | hsa-miR-15b-5p | USP42     |
| 137 | 94 | hsa-miR-15b-5p | STRADB    |
| 138 | 94 | hsa-miR-15b-5p | RNF217    |
| 139 | 94 | hsa-miR-15b-5p | TRANK1    |
| 140 | 94 | hsa-miR-15b-5p | LRRN3     |
| 141 | 94 | hsa-miR-15b-5p | ZFHX4     |
| 142 | 94 | hsa-miR-15b-5p | ZNF622    |
| 143 | 94 | hsa-miR-15b-5p | PTPRR     |
| 144 | 94 | hsa-miR-15b-5p | ATXN2     |
| 145 | 94 | hsa-miR-15b-5p | OOEP      |
| 146 | 94 | hsa-miR-15b-5p | INSR      |
| 147 | 94 | hsa-miR-15b-5p | P3H2      |
| 148 | 94 | hsa-miR-15b-5p | ZBTB39    |
| 149 | 94 | hsa-miR-15b-5p | SRPRA     |
| 150 | 94 | hsa-miR-15b-5p | PLXNA4    |
| 151 | 94 | hsa-miR-15b-5p | WNK3      |
| 152 | 94 | hsa-miR-15b-5p | PPP1R11   |
| 153 | 94 | hsa-miR-15b-5p | LATS1     |
| 154 | 94 | hsa-miR-15b-5p | DDX3X     |
| 155 | 94 | hsa-miR-15b-5p | LRIG2     |
| 156 | 94 | hsa-miR-15b-5p | ARHGDI1A  |
| 157 | 94 | hsa-miR-15b-5p | PPP2R1B   |
| 158 | 94 | hsa-miR-15b-5p | DCP1A     |
| 159 | 94 | hsa-miR-15b-5p | CHEK1     |
| 160 | 94 | hsa-miR-15b-5p | OMG       |
| 161 | 94 | hsa-miR-15b-5p | GALNT13   |
| 162 | 93 | hsa-miR-15b-5p | ACTR2     |
| 163 | 93 | hsa-miR-15b-5p | GHR       |
| 164 | 93 | hsa-miR-15b-5p | BTAF1     |
| 165 | 93 | hsa-miR-15b-5p | AVL9      |

|     |    |                |         |
|-----|----|----------------|---------|
| 166 | 93 | hsa-miR-15b-5p | FBXL20  |
| 167 | 93 | hsa-miR-15b-5p | DIXDC1  |
| 168 | 93 | hsa-miR-15b-5p | CCND1   |
| 169 | 93 | hsa-miR-15b-5p | 2-Sep   |
| 170 | 93 | hsa-miR-15b-5p | MFN2    |
| 171 | 93 | hsa-miR-15b-5p | E2F3    |
| 172 | 93 | hsa-miR-15b-5p | WNT3A   |
| 173 | 93 | hsa-miR-15b-5p | CHD2    |
| 174 | 93 | hsa-miR-15b-5p | ZNRF2   |
| 175 | 93 | hsa-miR-15b-5p | SOCS6   |
| 176 | 93 | hsa-miR-15b-5p | HSPA4L  |
| 177 | 93 | hsa-miR-15b-5p | SEL1L3  |
| 178 | 93 | hsa-miR-15b-5p | FOXK1   |
| 179 | 93 | hsa-miR-15b-5p | SYT3    |
| 180 | 93 | hsa-miR-15b-5p | HSPG2   |
| 181 | 93 | hsa-miR-15b-5p | CD2AP   |
| 182 | 93 | hsa-miR-15b-5p | SUCO    |
| 183 | 93 | hsa-miR-15b-5p | MYO5A   |
| 184 | 93 | hsa-miR-15b-5p | GATAD2A |
| 185 | 93 | hsa-miR-15b-5p | AMOTL1  |
| 186 | 93 | hsa-miR-15b-5p | KANK1   |
| 187 | 93 | hsa-miR-15b-5p | RBPJ    |
| 188 | 93 | hsa-miR-15b-5p | SYDE2   |
| 189 | 93 | hsa-miR-15b-5p | TMEM245 |
| 190 | 93 | hsa-miR-15b-5p | RPS6KA3 |
| 191 | 93 | hsa-miR-15b-5p | PLXNC1  |
| 192 | 93 | hsa-miR-15b-5p | VPS33B  |
| 193 | 93 | hsa-miR-15b-5p | KIF21A  |
| 194 | 92 | hsa-miR-15b-5p | ZMYM2   |
| 195 | 92 | hsa-miR-15b-5p | SUMO3   |
| 196 | 92 | hsa-miR-15b-5p | CACUL1  |
| 197 | 92 | hsa-miR-15b-5p | PIAS2   |
| 198 | 92 | hsa-miR-15b-5p | ACVR2A  |
| 199 | 92 | hsa-miR-15b-5p | TBP     |
| 200 | 92 | hsa-miR-15b-5p | STK33   |
| 201 | 92 | hsa-miR-15b-5p | SLIT2   |
| 202 | 92 | hsa-miR-15b-5p | XPO7    |
| 203 | 92 | hsa-miR-15b-5p | SMAD7   |
| 204 | 92 | hsa-miR-15b-5p | YTHDC1  |
| 205 | 92 | hsa-miR-15b-5p | SLC12A2 |
| 206 | 92 | hsa-miR-15b-5p | POU2F1  |
| 207 | 92 | hsa-miR-15b-5p | COP1    |
| 208 | 92 | hsa-miR-15b-5p | ADAMTS3 |
| 209 | 92 | hsa-miR-15b-5p | AGO4    |
| 210 | 92 | hsa-miR-15b-5p | KCNK10  |
| 211 | 92 | hsa-miR-15b-5p | ASH1L   |

|     |    |                |           |
|-----|----|----------------|-----------|
| 212 | 92 | hsa-miR-15b-5p | RAD23B    |
| 213 | 92 | hsa-miR-15b-5p | SIRT4     |
| 214 | 92 | hsa-miR-15b-5p | TMEM178B  |
| 215 | 92 | hsa-miR-15b-5p | RNF10     |
| 216 | 92 | hsa-miR-15b-5p | IFT74     |
| 217 | 92 | hsa-miR-15b-5p | PTH       |
| 218 | 92 | hsa-miR-15b-5p | G2E3      |
| 219 | 92 | hsa-miR-15b-5p | ATXN7L2   |
| 220 | 92 | hsa-miR-15b-5p | LITAF     |
| 221 | 92 | hsa-miR-15b-5p | KRTAP11-1 |
| 222 | 92 | hsa-miR-15b-5p | TRABD2B   |
| 223 | 92 | hsa-miR-15b-5p | ZNF449    |
| 224 | 92 | hsa-miR-15b-5p | RETREG2   |
| 225 | 92 | hsa-miR-15b-5p | DLL1      |
| 226 | 92 | hsa-miR-15b-5p | NHLRC2    |
| 227 | 92 | hsa-miR-15b-5p | SLC20A2   |
| 228 | 92 | hsa-miR-15b-5p | NAA25     |
| 229 | 92 | hsa-miR-15b-5p | LAMP3     |
| 230 | 92 | hsa-miR-15b-5p | TMEM183A  |
| 231 | 92 | hsa-miR-15b-5p | CDC25A    |
| 232 | 92 | hsa-miR-15b-5p | MEOX2     |
| 233 | 92 | hsa-miR-15b-5p | CPEB3     |
| 234 | 92 | hsa-miR-15b-5p | MEX3C     |
| 235 | 92 | hsa-miR-15b-5p | PCDH17    |
| 236 | 91 | hsa-miR-15b-5p | ATXN7L1   |
| 237 | 91 | hsa-miR-15b-5p | SIK1      |
| 238 | 91 | hsa-miR-15b-5p | SALL1     |
| 239 | 91 | hsa-miR-15b-5p | CC2D1B    |
| 240 | 91 | hsa-miR-15b-5p | TMCC1     |
| 241 | 91 | hsa-miR-15b-5p | ZNRF3     |
| 242 | 91 | hsa-miR-15b-5p | CLOCK     |
| 243 | 91 | hsa-miR-15b-5p | KRTAP4-6  |
| 244 | 91 | hsa-miR-15b-5p | CDC42SE2  |
| 245 | 91 | hsa-miR-15b-5p | ZFH3      |
| 246 | 91 | hsa-miR-15b-5p | PPM1A     |
| 247 | 91 | hsa-miR-15b-5p | CCNT1     |
| 248 | 91 | hsa-miR-15b-5p | NOS1      |
| 249 | 91 | hsa-miR-15b-5p | LRRK1     |
| 250 | 91 | hsa-miR-15b-5p | RPS6KA6   |
| 251 | 91 | hsa-miR-15b-5p | TLL1      |
| 252 | 91 | hsa-miR-15b-5p | EZH1      |
| 253 | 91 | hsa-miR-15b-5p | SPTLC1    |
| 254 | 91 | hsa-miR-15b-5p | AMER1     |
| 255 | 91 | hsa-miR-15b-5p | LARGE2    |
| 256 | 91 | hsa-miR-15b-5p | RARB      |
| 257 | 91 | hsa-miR-15b-5p | ZC3H13    |

|     |    |                |          |
|-----|----|----------------|----------|
| 258 | 91 | hsa-miR-15b-5p | CSDE1    |
| 259 | 90 | hsa-miR-15b-5p | WIP12    |
| 260 | 90 | hsa-miR-15b-5p | TFCP2L1  |
| 261 | 90 | hsa-miR-15b-5p | CDK5R1   |
| 262 | 90 | hsa-miR-15b-5p | CACNA2D1 |
| 263 | 90 | hsa-miR-15b-5p | TGFBR3   |
| 264 | 90 | hsa-miR-15b-5p | FAM133B  |
| 265 | 90 | hsa-miR-15b-5p | UBQLNL   |
| 266 | 90 | hsa-miR-15b-5p | TRIM66   |
| 267 | 90 | hsa-miR-15b-5p | ELMSAN1  |
| 268 | 90 | hsa-miR-15b-5p | AK4      |
| 269 | 90 | hsa-miR-15b-5p | ABHD2    |
| 270 | 90 | hsa-miR-15b-5p | C1orf21  |
| 271 | 90 | hsa-miR-15b-5p | NRN1     |
| 272 | 90 | hsa-miR-15b-5p | ADGRL1   |
| 273 | 90 | hsa-miR-15b-5p | JARID2   |
| 274 | 90 | hsa-miR-15b-5p | SYNRG    |
| 275 | 90 | hsa-miR-15b-5p | USP31    |
| 276 | 90 | hsa-miR-15b-5p | CD47     |
| 277 | 90 | hsa-miR-15b-5p | SEMA3A   |
| 278 | 90 | hsa-miR-15b-5p | LRIG1    |
| 279 | 90 | hsa-miR-15b-5p | TMC7     |
| 280 | 90 | hsa-miR-15b-5p | DENND1B  |
| 281 | 90 | hsa-miR-15b-5p | RAB9B    |
| 282 | 90 | hsa-miR-15b-5p | AMOT     |
| 283 | 90 | hsa-miR-15b-5p | FERMT2   |
| 284 | 90 | hsa-miR-15b-5p | ILDR2    |
| 285 | 90 | hsa-miR-15b-5p | CSRNP1   |
| 286 | 90 | hsa-miR-15b-5p | NR2C2    |
| 287 | 90 | hsa-miR-15b-5p | ELL      |
| 288 | 90 | hsa-miR-15b-5p | C12orf76 |
| 289 | 90 | hsa-miR-15b-5p | BAG4     |

miR, microRNA; hsa : Homo Sapiens.

**Table S3.** Functional annotation of biological process using miR-15b-5p target genes.

| ID         | Term                                                                    | Bonferroni<br>Correction<br><i>p</i> Value |
|------------|-------------------------------------------------------------------------|--------------------------------------------|
| GO:0048639 | positive regulation of developmental growth                             | 0.002443                                   |
| GO:0003281 | ventricular septum development                                          | 0.041377                                   |
| GO:0060842 | arterial endothelial cell differentiation                               | 0.015163                                   |
| GO:0090287 | regulation of cellular response to growth factor stimulus               | 0.011191                                   |
| GO:0043534 | blood vessel endothelial cell migration                                 | 0.026188                                   |
| GO:0002040 | sprouting angiogenesis                                                  | 0.035021                                   |
| GO:0002042 | cell migration involved in sprouting angiogenesis                       | 0.005491                                   |
| GO:0033674 | positive regulation of kinase activity                                  | 0.005989                                   |
| GO:0045860 | positive regulation of protein kinase activity                          | 0.016370                                   |
| GO:0071900 | regulation of protein serine/threonine kinase activity                  | 0.015943                                   |
| GO:0071902 | positive regulation of protein serine/threonine kinase activity         | 0.005770                                   |
| GO:0016055 | Wnt signaling pathway                                                   | 0.000248                                   |
| GO:0030111 | regulation of Wnt signaling pathway                                     | 0.001420                                   |
| GO:0030177 | positive regulation of Wnt signaling pathway                            | 0.000077                                   |
| GO:0060070 | canonical Wnt signaling pathway                                         | 0.005876                                   |
| GO:0060828 | regulation of canonical Wnt signaling pathway                           | 0.002788                                   |
| GO:0090263 | positive regulation of canonical Wnt signaling pathway                  | 0.000162                                   |
| GO:0031331 | positive regulation of cellular catabolic process                       | 0.007719                                   |
| GO:0042176 | regulation of protein catabolic process                                 | 0.001474                                   |
| GO:0010498 | proteasomal protein catabolic process                                   | 0.001766                                   |
| GO:0061136 | regulation of proteasomal protein catabolic process                     | 0.000676                                   |
| GO:1903050 | regulation of proteolysis involved in protein catabolic process         | 0.000039                                   |
| GO:2000058 | regulation of ubiquitin-dependent protein catabolic process             | 0.000164                                   |
| GO:0006511 | ubiquitin-dependent protein catabolic process                           | 0.000022                                   |
| GO:0043161 | proteasome-mediated ubiquitin-dependent protein catabolic process       | 0.001944                                   |
| GO:2000060 | positive regulation of ubiquitin-dependent protein catabolic process    | 0.015135                                   |
| GO:0032434 | regulation of proteasomal ubiquitin-dependent protein catabolic process | 0.018947                                   |
| GO:0048846 | axon extension involved in axon guidance                                | 0.005747                                   |
| GO:0021952 | central nervous system projection neuron axonogenesis                   | 0.015205                                   |
| GO:0048588 | developmental cell growth                                               | 0.004241                                   |
| GO:0060284 | regulation of cell development                                          | 0.000169                                   |
| GO:0010720 | positive regulation of cell development                                 | 0.007265                                   |
| GO:0051962 | positive regulation of nervous system development                       | 0.031384                                   |
| GO:0050767 | regulation of neurogenesis                                              | 0.022324                                   |
| GO:1990138 | neuron projection extension                                             | 0.005890                                   |
| GO:0050770 | regulation of axonogenesis                                              | 0.011492                                   |
| GO:0048675 | axon extension                                                          | 0.036953                                   |
| GO:0050772 | positive regulation of axonogenesis                                     | 0.006418                                   |



**Table S4.** Expressional differences based on age and gender (discovery and replication cohorts: n = 26, each).

|        |     | <b>miR-15b-5p</b> | <b>miR-15a-5p</b> | <b>miR-19b-3p</b> | <b>miR-27a-3p</b> | <b>miR-106b-5p</b> | <b>miR-320a-5p</b> | <b>miR-320a-3p</b> | <b>miR-451a</b> |
|--------|-----|-------------------|-------------------|-------------------|-------------------|--------------------|--------------------|--------------------|-----------------|
| Age    | Ct  | P = 0.547         | P = 0.487         | P = 0.510         | P = 0.957         | P = 0.527          | P = 0.903          | P = 0.998          | P = 0.355       |
|        |     | r = -0.124        | r = 0.143         | r = 0.135         | r = -0.011        | r = 0.130          | r = 0.025          | r = -0.001         | r = -0.189      |
|        | ASD | P = 0.314         | P = 0.909         | P = 0.690         | P = 0.707         | P = 0.985          | P = 0.573          | P = 0.059          | P = 0.879       |
|        |     | r = -0.205        | r = 0.023         | r = 0.082         | r = -0.077        | r = 0.004          | r = -0.116         | r = -0.374         | r = 0.031       |
| Gender | Ct  | P = 0.030         | P = 0.978         | P = 0.765         | P = 0.216         | P = 0.935          | P = 0.461          | P = 0.261          | P = 0.160       |
|        | ASD | P = 0.003         | P = 0.177         | P = 0.461         | P = 0.088         | P = 0.261          | P = 0.644          | P = 0.144          | P = 0.935       |

|        |     | <b>miR-494-5p</b> | <b>miR-494-3p</b> | <b>TGFBR3</b> | <b>MYBL1</b> |
|--------|-----|-------------------|-------------------|---------------|--------------|
| Age    | Ct  | P = 0.346         | P = 0.784         | P = 0.225     | P = 0.264    |
|        |     | r = 0.193         | r = 0.057         | r = 0.246     | r = 0.227    |
|        | ASD | P = 0.825         | P = 0.499         | P = 0.909     | P = 0.580    |
|        |     | r = 0.046         | r = -0.139        | r = 0.023     | r = 0.114    |
| Gender | Ct  | P = 0.338         | P = 0.849         | P = 0.718     | P = 0.196    |
|        | ASD | P = 0.531         | P = 0.216         | P = 0.765     | P = 0.988    |

ASD, Autism Spectrum disorder; miR, microRNA.

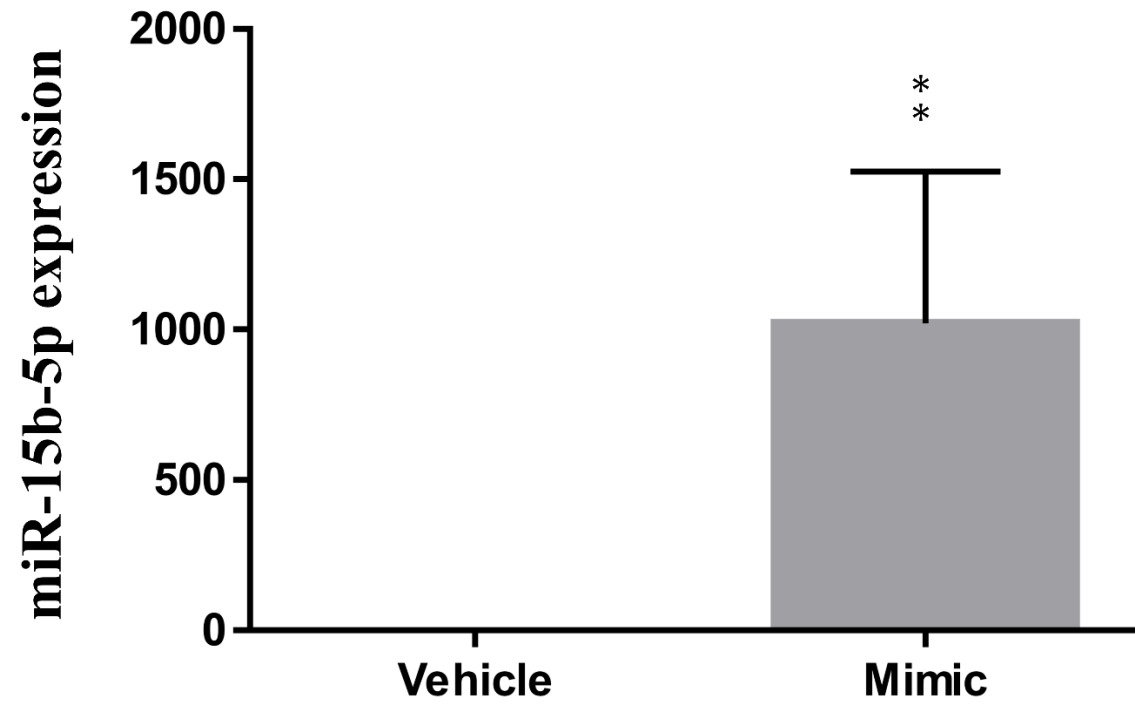

**Figure S1.** MiR-15b-5p expression in the miR-15b-5p oligo transfected HEK293 cells. The y-axis represents the ratio of the relative expression value of miR-15b-5p expression. miR, microRNA. \*  $p < 0.05$ , \*\*  $p < 0.01$ .
